# Supplementary material for: Brain Tissue-Derived Extracellular Vesicles in Alzheimer’s Disease Display Altered Key Protein Levels Including Cell Type-Specific Markers
Source: PubMed Central journal article supplement — J Alzheimers Dis. 2022 Nov 22;90(3):1057–72. doi: 10.3233/JAD-220322 (PMC9741741; doi:10.3233/jad-220322), 2022-11-22
Supplement: jad-90-jad220322-s002.pdf [file jad-90-jad220322-s002.pdf]

# EV-track New Data

## 1. General information

---

1. Please provide the email address that you used to log in to the EV-TRACK website.

yiaohuang141@gmail.com

2. Is this a pre-publication submission?

Yes

3. Please provide the first name and surname of the first author:

Huang, Yiyao

4. EV-specific study aim (indicate multiple if appropriate)

Biomarker

Identification of content (omics approaches)

5. Species of origin of the EVs

Homo sapiens

## 2. Sample characteristics

---

6. Sample type

(Homo sapiens)

Other sample type1: Brain tissue

## 22. Sample origin

---

10. Origin of the sample(s):

(Homo sapiens > Brain tissue)

Control condition

Other condition 1: Alzheimer disease

Other condition 2: APOE genotype

## 33. Separation protocol overview

---

11. Please indicate the number of different separation protocols used for:

(Homo sapiens > Brain tissue > Control condition)

1

12. Please indicate the number of different separation protocols used for:

(Homo sapiens > Brain tissue > Alzheimer disease)

1

13. Please indicate the number of different separation protocols used for:

(Homo sapiens > Brain tissue > APOE genotype)

1

14. Did you have separation steps that were consistent between all above mentioned samples/protocols?

Yes

## 34. Identical separation steps

---

**15. Specify which separation steps were consistent between samples:**

(Differential) (ultra)centrifugation  
Filtration  
Ultrafiltration  
Commercial method

**16. Indicate all centrifugation steps**

Below or equal to 800 g  
Between 800 g and 10,000 g  
Equal to or above 10,000 g and below 50,000 g  
Equal to or above 100,000 g and below 150,000 g

**17. Was the final centrifugation step aimed at obtaining an EV pellet?**

Yes

**18. Duration (Minutes)**

70

**19. Rotor type**

TH-641

**20. Exact speed (g)**

110000

**21. Was a wash step performed?**

No

**22. Filtration**

0.2 or 0.22  $\mu\text{m}$

**23. Specify the filter cutoff size (kDa)**

100

**24. Indicate the membrane type**

Polyethersulfone (PES)

**25. Specify the commercial method that was used:**

qEV

**35. Grouping of samples**

---

**26. Please group your different sample types by different groups of separation protocol.**

|                                                 | Group 1 | Group 2 | Group 3 | Group 4 | Group 5 | Group 6 | Group 7 | Group 8 | Group 9 | Group 10 |
|-------------------------------------------------|---------|---------|---------|---------|---------|---------|---------|---------|---------|----------|
| Homo sapiens > Brain tissue > Control condition | X       |         |         |         |         |         |         |         |         |          |
| Homo sapiens > Brain tissue > Alzheimer disease | X       |         |         |         |         |         |         |         |         |          |
| Homo sapiens > Brain tissue > APOE genotype     | X       |         |         |         |         |         |         |         |         |          |

**36. Separation protocol**

---

**27. Indicate all methods that were used in the separation protocol for the following sample:  
Homo sapiens > Brain tissue > Control condition**

**Homo sapiens > Brain tissue > Alzheimer disease**

**Homo sapiens > Brain tissue > APOE genotype**

(Differential) (ultra)centrifugation

Filtration

Ultrafiltration

Commercial method

**28. Indicate all centrifugation steps**

**Homo sapiens > Brain tissue > Control condition**

**Homo sapiens > Brain tissue > Alzheimer disease**

**Homo sapiens > Brain tissue > APOE genotype**

Below or equal to 800 g

Between 800 g and 10,000 g

Equal to or above 10,000 g and below 50,000 g

Equal to or above 100,000 g and below 150,000 g

**29. Was the final centrifugation step aimed at obtaining an EV pellet?**

**Homo sapiens > Brain tissue > Control condition**

**Homo sapiens > Brain tissue > Alzheimer disease**

**Homo sapiens > Brain tissue > APOE genotype**

Yes

**30. Duration (Minutes)**

**Homo sapiens > Brain tissue > Control condition**

**Homo sapiens > Brain tissue > Alzheimer disease**

**Homo sapiens > Brain tissue > APOE genotype**

70

**31. Rotor type**

**Homo sapiens > Brain tissue > Control condition**

**Homo sapiens > Brain tissue > Alzheimer disease**

**Homo sapiens > Brain tissue > APOE genotype**

TH-641

**32. Exact speed (g)**

**Homo sapiens > Brain tissue > Control condition**

**Homo sapiens > Brain tissue > Alzheimer disease**

**Homo sapiens > Brain tissue > APOE genotype**

110000

**33. Was a wash step performed?**

Homo sapiens > Brain tissue > Control condition

Homo sapiens > Brain tissue > Alzheimer disease

Homo sapiens > Brain tissue > APOE genotype

No

**34. Filtration**

Homo sapiens > Brain tissue > Control condition

Homo sapiens > Brain tissue > Alzheimer disease

Homo sapiens > Brain tissue > APOE genotype

0.2 or 0.22  $\mu\text{m}$

**35. Specify the filter cutoff size (kDa)**

Homo sapiens > Brain tissue > Control condition

Homo sapiens > Brain tissue > Alzheimer disease

Homo sapiens > Brain tissue > APOE genotype

100

**36. Please indicate the membrane type**

Homo sapiens > Brain tissue > Control condition

Homo sapiens > Brain tissue > Alzheimer disease

Homo sapiens > Brain tissue > APOE genotype

Polyethersulfone (PES)

**37. Specify the commercial method that was used:**

Homo sapiens > Brain tissue > Control condition

Homo sapiens > Brain tissue > Alzheimer disease

Homo sapiens > Brain tissue > APOE genotype

qEV

**38. Were multiple subtypes of EV separately isolated when applying this protocol on the specified sample?**

Homo sapiens > Brain tissue > Control condition

Homo sapiens > Brain tissue > Alzheimer disease

Homo sapiens > Brain tissue > APOE genotype

Yes

**39. How were these subtypes separated from each other? Based on:**

Homo sapiens > Brain tissue > Control condition

Homo sapiens > Brain tissue > Alzheimer disease

Homo sapiens > Brain tissue > APOE genotype

Other: Separation method

40. Specify the defining characteristic of the subtype you wish to proceed with for filling in the rest of the form:

Homo sapiens > Brain tissue > Control condition

Homo sapiens > Brain tissue > Alzheimer disease

Homo sapiens > Brain tissue > APOE genotype

Subtype: 10K

Subtype: EVs

## 46. Protein concentration and yield

---

41. How was EV protein concentration determined?

Homo sapiens > Brain tissue > Control condition > Filtration, qEV, Ultrafiltration, (Differential) (ultra)centrifugation > Subtype: 10K

BCA

42. Was the EV protein yield determined?

Homo sapiens > Brain tissue > Control condition > Filtration, qEV, Ultrafiltration, (Differential) (ultra)centrifugation > Subtype: 10K

Yes, other:: per 100 mg of tissue

43. Specify the yield ( $\mu\text{g}$ )

Homo sapiens > Brain tissue > Control condition > Filtration, qEV, Ultrafiltration, (Differential) (ultra)centrifugation > Subtype: 10K

18

44. How was EV protein concentration determined?

Homo sapiens > Brain tissue > Control condition > Filtration, qEV, Ultrafiltration, (Differential) (ultra)centrifugation > Subtype: EVs

BCA

45. Was the EV protein yield determined?

Homo sapiens > Brain tissue > Control condition > Filtration, qEV, Ultrafiltration, (Differential) (ultra)centrifugation > Subtype: EVs

Yes, other:: per 100 mg of tissue

46. Specify the yield ( $\mu\text{g}$ )

Homo sapiens > Brain tissue > Control condition > Filtration, qEV, Ultrafiltration, (Differential) (ultra)centrifugation > Subtype: EVs

2.9

47. How was EV protein concentration determined?

Homo sapiens > Brain tissue > Alzheimer disease > Filtration, qEV, Ultrafiltration, (Differential) (ultra)centrifugation > Subtype: EVs

BCA

48. Was the EV protein yield determined?

Homo sapiens > Brain tissue > Alzheimer disease > Filtration, qEV, Ultrafiltration, (Differential) (ultra)centrifugation > Subtype: EVs

Yes, other:: per 100 mg brain tissue

49. Specify the yield ( $\mu\text{g}$ )

Homo sapiens > Brain tissue > Alzheimer disease > Filtration, qEV, Ultrafiltration, (Differential) (ultra)centrifugation > Subtype: EVs

**50. How was EV protein concentration determined?**

Homo sapiens > Brain tissue > Alzheimer disease > Filtration, qEV, Ultrafiltration, (Differential) (ultra)centrifugation > Subtype: 10K

BCA

**51. Was the EV protein yield determined?**

Homo sapiens > Brain tissue > Alzheimer disease > Filtration, qEV, Ultrafiltration, (Differential) (ultra)centrifugation > Subtype: 10K

Yes, other:: per 100 mg of tissue

**52. Specify the yield (µg)**

Homo sapiens > Brain tissue > Alzheimer disease > Filtration, qEV, Ultrafiltration, (Differential) (ultra)centrifugation > Subtype: 10K

30

**53. How was EV protein concentration determined?**

Homo sapiens > Brain tissue > APOE genotype > Filtration, qEV, Ultrafiltration, (Differential) (ultra)centrifugation > Subtype: EVs

BCA

**54. Was the EV protein yield determined?**

Homo sapiens > Brain tissue > APOE genotype > Filtration, qEV, Ultrafiltration, (Differential) (ultra)centrifugation > Subtype: EVs

Yes, other:: per 100 mg of tissue

**55. How was EV protein concentration determined?**

Homo sapiens > Brain tissue > APOE genotype > Filtration, qEV, Ultrafiltration, (Differential) (ultra)centrifugation > Subtype: 10K

BCA

**56. Was the EV protein yield determined?**

Homo sapiens > Brain tissue > APOE genotype > Filtration, qEV, Ultrafiltration, (Differential) (ultra)centrifugation > Subtype: 10K

Yes, other:: per 100 mg of tissue

**57. Specify the yield (µg)**

Homo sapiens > Brain tissue > APOE genotype > Filtration, qEV, Ultrafiltration, (Differential) (ultra)centrifugation > Subtype: 10K

29

## **47. Protein characterization overview**

---

**58. Protein analysis: indicate all methods that were used on EVs of the following sample type/isolation protocol:**

Homo sapiens > Brain tissue > Control condition > Filtration, qEV, Ultrafiltration, (Differential) (ultra)centrifugation > Subtype: 10K

Protein analysis for the described sample type/isolation protocol combination was already included in a previous publication by the same group: PMID =: 32944174  
Proteomics

**59. Protein analysis: indicate all methods that were used on EVs of the following sample type/isolation protocol:**

Homo sapiens > Brain tissue > Control condition > Filtration, qEV, Ultrafiltration, (Differential) (ultra)centrifugation > Subtype: EVs

Protein analysis for the described sample type/isolation protocol combination was already included in a previous publication by the same group: PMID =: 32944174  
Proteomics

**60. Protein analysis: indicate all methods that were used on EVs of the following sample type/isolation protocol: Homo sapiens > Brain tissue > Alzheimer disease > Filtration, qEV, Ultrafiltration, (Differential) (ultra)centrifugation > Subtype: EVs**

Protein analysis for the described sample type/isolation protocol combination was already included in a previous publication by the same group: PMID =: 32944174  
Proteomics

**61. Protein analysis: indicate all methods that were used on EVs of the following sample type/isolation protocol: Homo sapiens > Brain tissue > Alzheimer disease > Filtration, qEV, Ultrafiltration, (Differential) (ultra)centrifugation > Subtype: 10K**

Protein analysis for the described sample type/isolation protocol combination was already included in a previous publication by the same group: PMID =: 32944174  
Proteomics

**62. Protein analysis: indicate all methods that were used on EVs of the following sample type/isolation protocol: Homo sapiens > Brain tissue > APOE genotype > Filtration, qEV, Ultrafiltration, (Differential) (ultra)centrifugation > Subtype: EVs**

Protein analysis for the described sample type/isolation protocol combination was already included in a previous publication by the same group: PMID =: 32944174  
Proteomics

**63. Protein analysis: indicate all methods that were used on EVs of the following sample type/isolation protocol: Homo sapiens > Brain tissue > APOE genotype > Filtration, qEV, Ultrafiltration, (Differential) (ultra)centrifugation > Subtype: 10K**

Protein analysis for the described sample type/isolation protocol combination was already included in a previous publication by the same group: PMID =: 32944174  
Proteomics

## 53. Proteomics

---

**64. Data submitted to a publicly available database (e.g. ExoCarta, Vesiclepedia)?**

No

## 58. RNA/lipid analysis

---

**65. Was vesicular RNA analyzed?**

**Homo sapiens > Brain tissue > Control condition > Filtration, qEV, Ultrafiltration, (Differential) (ultra)centrifugation > Subtype: 10K**

Yes

**66. Type of RNA analysis**

**Homo sapiens > Brain tissue > Control condition > Filtration, qEV, Ultrafiltration, (Differential) (ultra)centrifugation > Subtype: 10K**

RNA sequencing

**67. RNA data submitted to an EV-related database (e.g. Exocarta, Vesiclepedia)?**

**Homo sapiens > Brain tissue > Control condition > Filtration, qEV, Ultrafiltration, (Differential) (ultra)centrifugation > Subtype: 10K**

No

**68. Proteinase treatment**

**Homo sapiens > Brain tissue > Control condition > Filtration, qEV, Ultrafiltration, (Differential) (ultra)centrifugation > Subtype: 10K**

No

**69. RNase treatment**

Homo sapiens > Brain tissue > Control condition > Filtration, qEV, Ultrafiltration, (Differential) (ultra)centrifugation  
> Subtype: 10K

No

**70. Was lipid analysis performed on the obtained EVs?**

Homo sapiens > Brain tissue > Control condition > Filtration, qEV, Ultrafiltration, (Differential) (ultra)centrifugation  
> Subtype: 10K

No

**71. Was vesicular RNA analyzed?**

Homo sapiens > Brain tissue > Control condition > Filtration, qEV, Ultrafiltration, (Differential) (ultra)centrifugation  
> Subtype: EVs

Yes

**72. Type of RNA analysis**

Homo sapiens > Brain tissue > Control condition > Filtration, qEV, Ultrafiltration, (Differential) (ultra)centrifugation  
> Subtype: EVs

RNAsequencing

**73. RNA data submitted to an EV-related database (e.g. Exocarta, Vesiclepedia)?**

Homo sapiens > Brain tissue > Control condition > Filtration, qEV, Ultrafiltration, (Differential) (ultra)centrifugation  
> Subtype: EVs

No

**74. Proteinase treatment**

Homo sapiens > Brain tissue > Control condition > Filtration, qEV, Ultrafiltration, (Differential) (ultra)centrifugation  
> Subtype: EVs

No

**75. RNase treatment**

Homo sapiens > Brain tissue > Control condition > Filtration, qEV, Ultrafiltration, (Differential) (ultra)centrifugation  
> Subtype: EVs

No

**76. Was lipid analysis performed on the obtained EVs?**

Homo sapiens > Brain tissue > Control condition > Filtration, qEV, Ultrafiltration, (Differential) (ultra)centrifugation  
> Subtype: EVs

No

**77. Was vesicular RNA analyzed?**

Homo sapiens > Brain tissue > Alzheimer disease > Filtration, qEV, Ultrafiltration, (Differential) (ultra)centrifugation  
> Subtype: EVs

Yes

**78. Type of RNA analysis**

Homo sapiens > Brain tissue > Alzheimer disease > Filtration, qEV, Ultrafiltration, (Differential) (ultra)centrifugation  
> Subtype: EVs

RNAsequencing

**79. RNA data submitted to an EV-related database (e.g. Exocarta, Vesiclepedia)?**

Homo sapiens > Brain tissue > Alzheimer disease > Filtration, qEV, Ultrafiltration, (Differential) (ultra)centrifugation  
> Subtype: EVs

No



**80. Proteinase treatment**

Homo sapiens > Brain tissue > Alzheimer disease > Filtration, qEV, Ultrafiltration, (Differential) (ultra)centrifugation > Subtype: EVs

No

**81. RNase treatment**

Homo sapiens > Brain tissue > Alzheimer disease > Filtration, qEV, Ultrafiltration, (Differential) (ultra)centrifugation > Subtype: EVs

No

**82. Was lipid analysis performed on the obtained EVs?**

Homo sapiens > Brain tissue > Alzheimer disease > Filtration, qEV, Ultrafiltration, (Differential) (ultra)centrifugation > Subtype: EVs

No

**83. Was vesicular RNA analyzed?**

Homo sapiens > Brain tissue > Alzheimer disease > Filtration, qEV, Ultrafiltration, (Differential) (ultra)centrifugation > Subtype: 10K

Yes

**84. Type of RNA analysis**

Homo sapiens > Brain tissue > Alzheimer disease > Filtration, qEV, Ultrafiltration, (Differential) (ultra)centrifugation > Subtype: 10K

RNAsequencing

**85. RNA data submitted to an EV-related database (e.g. Exocarta, Vesiclepedia)?**

Homo sapiens > Brain tissue > Alzheimer disease > Filtration, qEV, Ultrafiltration, (Differential) (ultra)centrifugation > Subtype: 10K

No

**86. Proteinase treatment**

Homo sapiens > Brain tissue > Alzheimer disease > Filtration, qEV, Ultrafiltration, (Differential) (ultra)centrifugation > Subtype: 10K

No

**87. RNase treatment**

Homo sapiens > Brain tissue > Alzheimer disease > Filtration, qEV, Ultrafiltration, (Differential) (ultra)centrifugation > Subtype: 10K

No

**88. Was lipid analysis performed on the obtained EVs?**

Homo sapiens > Brain tissue > Alzheimer disease > Filtration, qEV, Ultrafiltration, (Differential) (ultra)centrifugation > Subtype: 10K

No

**89. Was vesicular RNA analyzed?**

Homo sapiens > Brain tissue > APOE genotype > Filtration, qEV, Ultrafiltration, (Differential) (ultra)centrifugation > Subtype: EVs

Yes

**90. Type of RNA analysis**

Homo sapiens > Brain tissue > APOE genotype > Filtration, qEV, Ultrafiltration, (Differential) (ultra)centrifugation > Subtype: EVs

RNAsequencing

91. RNA data submitted to an EV-related database (e.g. Exocarta, Vesiclepedia)?

Homo sapiens > Brain tissue > APOE genotype > Filtration, qEV, Ultrafiltration, (Differential) (ultra)centrifugation  
> Subtype: EVs

No

92. Proteinase treatment

Homo sapiens > Brain tissue > APOE genotype > Filtration, qEV, Ultrafiltration, (Differential) (ultra)centrifugation  
> Subtype: EVs

No

93. RNase treatment

Homo sapiens > Brain tissue > APOE genotype > Filtration, qEV, Ultrafiltration, (Differential) (ultra)centrifugation  
> Subtype: EVs

No

94. Was lipid analysis performed on the obtained EVs?

Homo sapiens > Brain tissue > APOE genotype > Filtration, qEV, Ultrafiltration, (Differential) (ultra)centrifugation  
> Subtype: EVs

No

95. Was vesicular RNA analyzed?

Homo sapiens > Brain tissue > APOE genotype > Filtration, qEV, Ultrafiltration, (Differential) (ultra)centrifugation  
> Subtype: 10K

Yes

96. Type of RNA analysis

Homo sapiens > Brain tissue > APOE genotype > Filtration, qEV, Ultrafiltration, (Differential) (ultra)centrifugation  
> Subtype: 10K

RNAsequencing

97. RNA data submitted to an EV-related database (e.g. Exocarta, Vesiclepedia)?

Homo sapiens > Brain tissue > APOE genotype > Filtration, qEV, Ultrafiltration, (Differential) (ultra)centrifugation  
> Subtype: 10K

No

98. Proteinase treatment

Homo sapiens > Brain tissue > APOE genotype > Filtration, qEV, Ultrafiltration, (Differential) (ultra)centrifugation  
> Subtype: 10K

No

99. RNase treatment

Homo sapiens > Brain tissue > APOE genotype > Filtration, qEV, Ultrafiltration, (Differential) (ultra)centrifugation  
> Subtype: 10K

No

100. Was lipid analysis performed on the obtained EVs?

Homo sapiens > Brain tissue > APOE genotype > Filtration, qEV, Ultrafiltration, (Differential) (ultra)centrifugation  
> Subtype: 10K

No

## 59. Particle analysis overview

---

101. Particle analysis: indicate all methods that were used on EVs of the following sample type/isolation protocol:

Homo sapiens > Brain tissue > Control condition > Filtration, qEV, Ultrafiltration, (Differential) (ultra)centrifugation  
> Subtype: 10K

Other1: nanoFCM flow nanoAnalyzer

**102. Particle analysis: indicate all methods that were used on EVs of the following sample type/isolation protocol: Homo sapiens > Brain tissue > Control condition > Filtration, qEV, Ultrafiltration, (Differential) (ultra)centrifugation > Subtype: EVs**

Other1: nanoFCM flow nanoAnalyzer

**103. Particle analysis: indicate all methods that were used on EVs of the following sample type/isolation protocol: Homo sapiens > Brain tissue > Alzheimer disease > Filtration, qEV, Ultrafiltration, (Differential) (ultra)centrifugation > Subtype: EVs**

Other1: nanoFCM flow nanoAnalyzer

**104. Particle analysis: indicate all methods that were used on EVs of the following sample type/isolation protocol: Homo sapiens > Brain tissue > Alzheimer disease > Filtration, qEV, Ultrafiltration, (Differential) (ultra)centrifugation > Subtype: 10K**

Other1: nanoFCM flow nanoAnalyzer

**105. Particle analysis: indicate all methods that were used on EVs of the following sample type/isolation protocol: Homo sapiens > Brain tissue > APOE genotype > Filtration, qEV, Ultrafiltration, (Differential) (ultra)centrifugation > Subtype: EVs**

Other1: nanoFCM flow nanoAnalyzer

**106. Particle analysis: indicate all methods that were used on EVs of the following sample type/isolation protocol: Homo sapiens > Brain tissue > APOE genotype > Filtration, qEV, Ultrafiltration, (Differential) (ultra)centrifugation > Subtype: 10K**

Other1: nanoFCM flow nanoAnalyzer

## 65. Other 1

---

**107. Particle size is reported as:**

**Homo sapiens > Brain tissue > Control condition > Filtration, qEV, Ultrafiltration, (Differential) (ultra)centrifugation > Subtype: 10K**

Size range/distribution

**108. Specify the reported size (nm)**

**Homo sapiens > Brain tissue > Control condition > Filtration, qEV, Ultrafiltration, (Differential) (ultra)centrifugation > Subtype: 10K**

40-145

**109. Was this method also used to determine EV concentration?**

**Homo sapiens > Brain tissue > Control condition > Filtration, qEV, Ultrafiltration, (Differential) (ultra)centrifugation > Subtype: 10K**

Yes

**110. Was the EV particle yield determined?**

**Homo sapiens > Brain tissue > Control condition > Filtration, qEV, Ultrafiltration, (Differential) (ultra)centrifugation > Subtype: 10K**

Yes, other:: /100 mg brain tissue

**111. Specify the particle yield**

**Homo sapiens > Brain tissue > Control condition > Filtration, qEV, Ultrafiltration, (Differential) (ultra)centrifugation > Subtype: 10K**

1.14E+09

**112. Particle size is reported as:**

**Homo sapiens > Brain tissue > Control condition > Filtration, qEV, Ultrafiltration, (Differential) (ultra)centrifugation > Subtype: EVs**

Size range/distribution

**113. Specify the reported size (nm)**

Homo sapiens > Brain tissue > Control condition > Filtration, qEV, Ultrafiltration, (Differential) (ultra)centrifugation > Subtype: EVs

40-145 nm

**114. Was this method also used to determine EV concentration?**

Homo sapiens > Brain tissue > Control condition > Filtration, qEV, Ultrafiltration, (Differential) (ultra)centrifugation > Subtype: EVs

Yes

**115. Was the EV particle yield determined?**

Homo sapiens > Brain tissue > Control condition > Filtration, qEV, Ultrafiltration, (Differential) (ultra)centrifugation > Subtype: EVs

Yes, other:: /100 mg brain tissue

**116. Specify the particle yield**

Homo sapiens > Brain tissue > Control condition > Filtration, qEV, Ultrafiltration, (Differential) (ultra)centrifugation > Subtype: EVs

3.36E+09

**117. Particle size is reported as:**

Homo sapiens > Brain tissue > Alzheimer disease > Filtration, qEV, Ultrafiltration, (Differential) (ultra)centrifugation > Subtype: EVs

Size range/distribution

**118. Specify the reported size (nm)**

Homo sapiens > Brain tissue > Alzheimer disease > Filtration, qEV, Ultrafiltration, (Differential) (ultra)centrifugation > Subtype: EVs

40-145nm

**119. Was this method also used to determine EV concentration?**

Homo sapiens > Brain tissue > Alzheimer disease > Filtration, qEV, Ultrafiltration, (Differential) (ultra)centrifugation > Subtype: EVs

Yes

**120. Was the EV particle yield determined?**

Homo sapiens > Brain tissue > Alzheimer disease > Filtration, qEV, Ultrafiltration, (Differential) (ultra)centrifugation > Subtype: EVs

Yes, other:: /100 mg brain tissue

**121. Specify the particle yield**

Homo sapiens > Brain tissue > Alzheimer disease > Filtration, qEV, Ultrafiltration, (Differential) (ultra)centrifugation > Subtype: EVs

2.25E+09

**122. Particle size is reported as:**

Homo sapiens > Brain tissue > Alzheimer disease > Filtration, qEV, Ultrafiltration, (Differential) (ultra)centrifugation > Subtype: 10K

Size range/distribution

**123. Specify the reported size (nm)**

Homo sapiens > Brain tissue > Alzheimer disease > Filtration, qEV, Ultrafiltration, (Differential) (ultra)centrifugation > Subtype: 10K

40-145nm

**124. Was this method also used to determine EV concentration?**

Homo sapiens > Brain tissue > Alzheimer disease > Filtration, qEV, Ultrafiltration, (Differential) (ultra)centrifugation > Subtype: 10K

Yes

**125. Was the EV particle yield determined?**

Homo sapiens > Brain tissue > Alzheimer disease > Filtration, qEV, Ultrafiltration, (Differential) (ultra)centrifugation > Subtype: 10K

Yes, other:: /100 mg brain tissue

**126. Specify the particle yield**

Homo sapiens > Brain tissue > Alzheimer disease > Filtration, qEV, Ultrafiltration, (Differential) (ultra)centrifugation > Subtype: 10K

1.14E+09

**127. Particle size is reported as:**

Homo sapiens > Brain tissue > APOE genotype > Filtration, qEV, Ultrafiltration, (Differential) (ultra)centrifugation > Subtype: EVs

Size range/distribution

**128. Specify the reported size (nm)**

Homo sapiens > Brain tissue > APOE genotype > Filtration, qEV, Ultrafiltration, (Differential) (ultra)centrifugation > Subtype: EVs

40-145 nm

**129. Was this method also used to determine EV concentration?**

Homo sapiens > Brain tissue > APOE genotype > Filtration, qEV, Ultrafiltration, (Differential) (ultra)centrifugation > Subtype: EVs

Yes

**130. Was the EV particle yield determined?**

Homo sapiens > Brain tissue > APOE genotype > Filtration, qEV, Ultrafiltration, (Differential) (ultra)centrifugation > Subtype: EVs

Yes, other:: /100 mg brain tissue

**131. Specify the particle yield**

Homo sapiens > Brain tissue > APOE genotype > Filtration, qEV, Ultrafiltration, (Differential) (ultra)centrifugation > Subtype: EVs

2.25E+09

**132. Particle size is reported as:**

Homo sapiens > Brain tissue > APOE genotype > Filtration, qEV, Ultrafiltration, (Differential) (ultra)centrifugation > Subtype: 10K

Size range/distribution

**133. Specify the reported size (nm)**

Homo sapiens > Brain tissue > APOE genotype > Filtration, qEV, Ultrafiltration, (Differential) (ultra)centrifugation > Subtype: 10K

40-140 nm

**134. Was this method also used to determine EV concentration?**

Homo sapiens > Brain tissue > APOE genotype > Filtration, qEV, Ultrafiltration, (Differential) (ultra)centrifugation > Subtype: 10K

Yes

**135. Was the EV particle yield determined?**

**Homo sapiens > Brain tissue > APOE genotype > Filtration, qEV, Ultrafiltration, (Differential) (ultra)centrifugation > Subtype: 10K**

Yes, other:: /100 mg brain tissue

**136. Specify the particle yield**

**Homo sapiens > Brain tissue > APOE genotype > Filtration, qEV, Ultrafiltration, (Differential) (ultra)centrifugation > Subtype: 10K**

1.14E+09

## **68. EV terminology**

---

**137. How were these vesicles designated throughout the publication?**

**Homo sapiens > Brain tissue > Control condition > Filtration, qEV, Ultrafiltration, (Differential) (ultra)centrifugation > Subtype: 10K**

extracellular vesicle

**138. How were these vesicles designated throughout the publication?**

**Homo sapiens > Brain tissue > Control condition > Filtration, qEV, Ultrafiltration, (Differential) (ultra)centrifugation > Subtype: EVs**

extracellular vesicle

**139. How were these vesicles designated throughout the publication?**

**Homo sapiens > Brain tissue > Alzheimer disease > Filtration, qEV, Ultrafiltration, (Differential) (ultra)centrifugation > Subtype: EVs**

extracellular vesicle

**140. How were these vesicles designated throughout the publication?**

**Homo sapiens > Brain tissue > Alzheimer disease > Filtration, qEV, Ultrafiltration, (Differential) (ultra)centrifugation > Subtype: 10K**

extracellular vesicle

**141. How were these vesicles designated throughout the publication?**

**Homo sapiens > Brain tissue > APOE genotype > Filtration, qEV, Ultrafiltration, (Differential) (ultra)centrifugation > Subtype: EVs**

extracellular vesicle

**142. How were these vesicles designated throughout the publication?**

**Homo sapiens > Brain tissue > APOE genotype > Filtration, qEV, Ultrafiltration, (Differential) (ultra)centrifugation > Subtype: 10K**

extracellular vesicle
